# Supplementary material
Source: PubMed Central journal article supplement (PMC4048975)
Supplement: Supp_Fig1.pdf [file Supp_Fig1.pdf]

## Supplementary Data

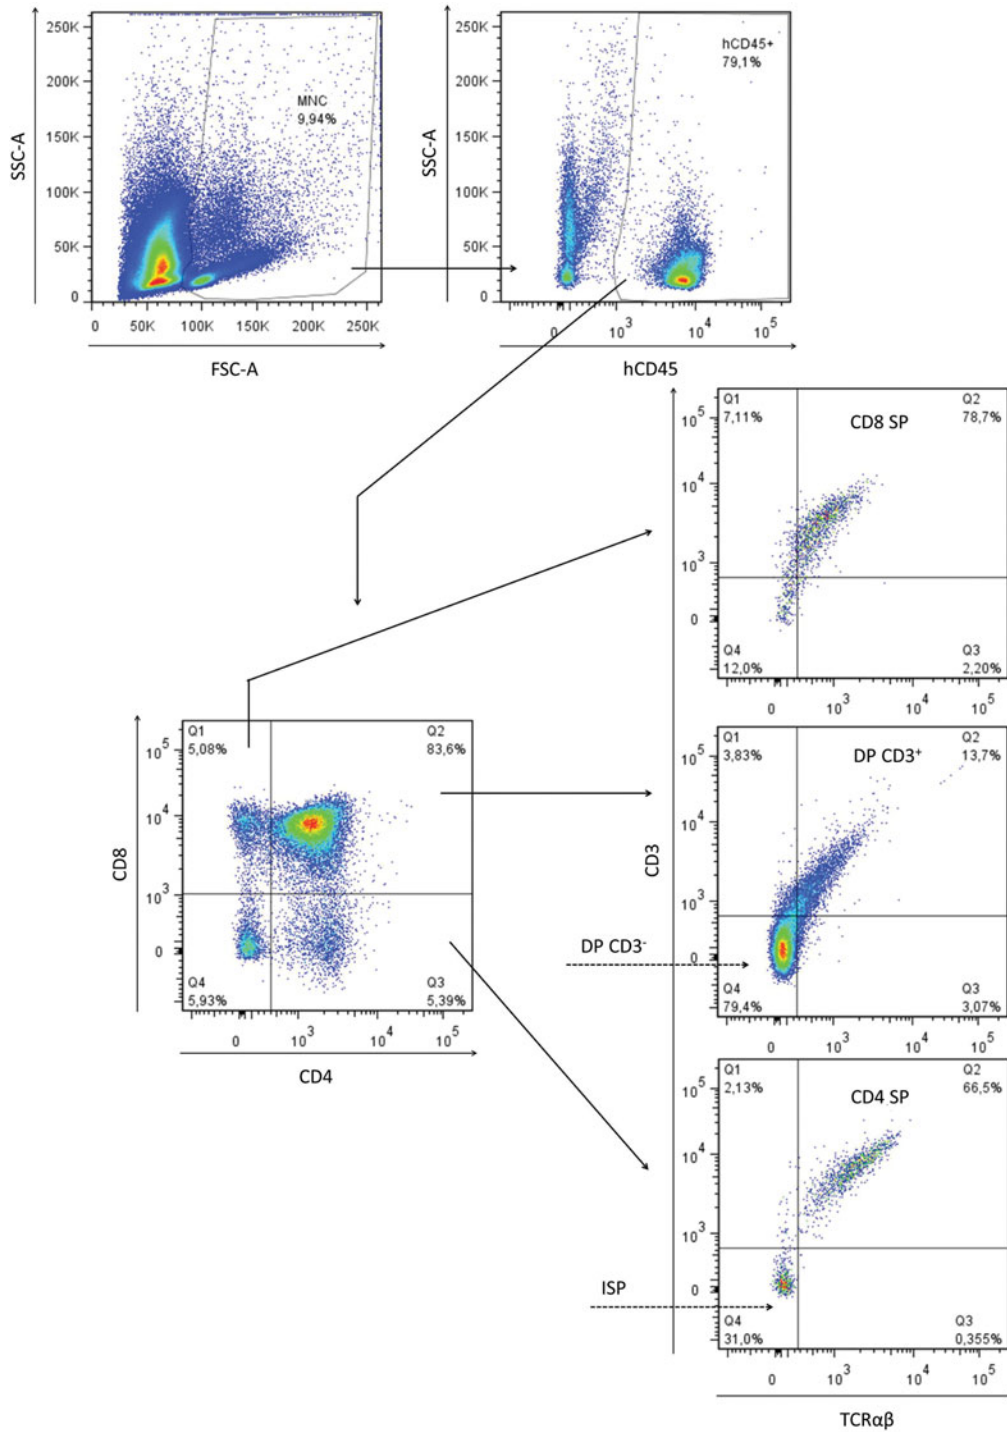

**SUPPLEMENTARY FIG. S1.** Gating strategy for T-cell developmental stages in thymus of secondary recipient. Thymocytes were gated based on side scatter (SSC-A) and forward scatter (FSC-A) and thereafter on expression of human CD45 (hCD45). Four populations can be discriminated based on expression of CD4 and CD8, within these we gated on CD3<sup>-</sup>TCRαβ<sup>-</sup> and CD3<sup>+</sup>TCRαβ<sup>+</sup>. ISP, immature single positive, CD4<sup>+</sup>CD3<sup>-</sup> TCRαβ<sup>-</sup>; DP CD3<sup>-</sup>, double positive CD3<sup>-</sup>, CD4<sup>+</sup>CD8<sup>+</sup>CD3<sup>-</sup> TCRαβ<sup>-</sup>; DP CD3<sup>+</sup>, double positive CD3<sup>+</sup>, CD4<sup>+</sup>CD8<sup>+</sup>CD3<sup>+</sup> TCRαβ<sup>+</sup>; CD4 SP, CD4<sup>+</sup> single positive, CD4<sup>+</sup>CD3<sup>+</sup> TCRαβ<sup>+</sup>; CD8 SP, CD8<sup>+</sup> single positive, CD8<sup>+</sup>CD3<sup>+</sup> TCRαβ<sup>+</sup>.
