# Supplementary material
Source: PubMed Central journal article supplement (PMC4048975)
Supplement: Supp_Fig2.pdf [file Supp_Fig2.pdf]

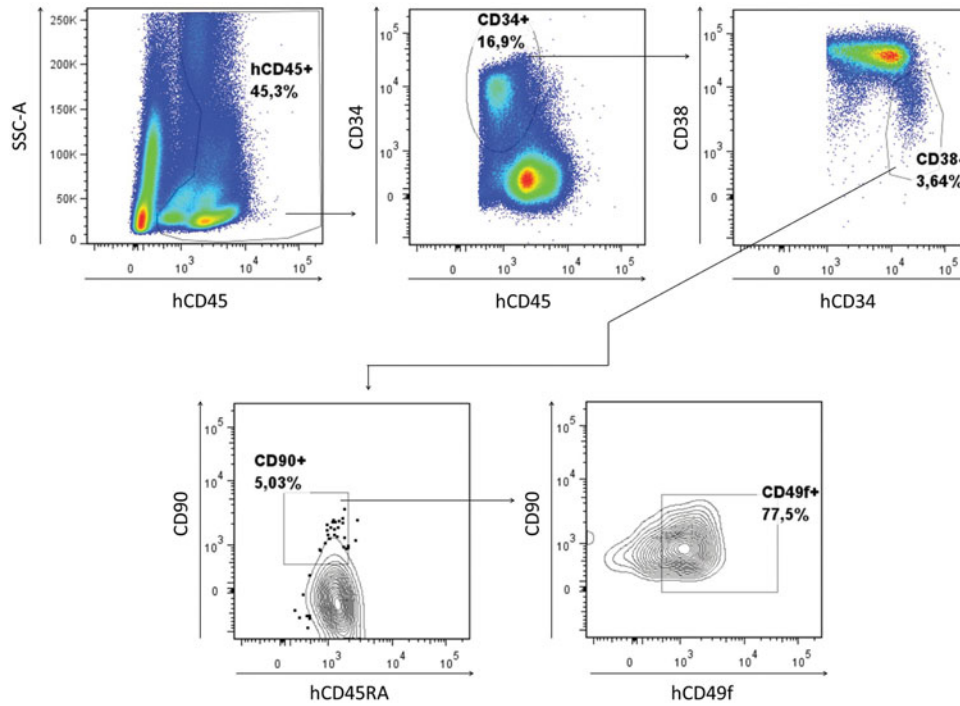

**SUPPLEMENTARY FIG. S2.** Gating strategy for human HSCs in bone marrow of secondary recipient. CD34<sup>+</sup> HSPCs were gated within human CD45<sup>+</sup> cells. Within the CD34<sup>+</sup> a sequential gating was performed on CD38<sup>-</sup> cells, followed by CD90<sup>+</sup>CD45RA<sup>-</sup> cells and CD49f<sup>+</sup> cells as described by Notta et al.<sup>14</sup>
