# Supplementary material
Source: PubMed Central journal article supplement (PMC4048975)
Supplement: Supp_Fig3.pdf [file Supp_Fig3.pdf]

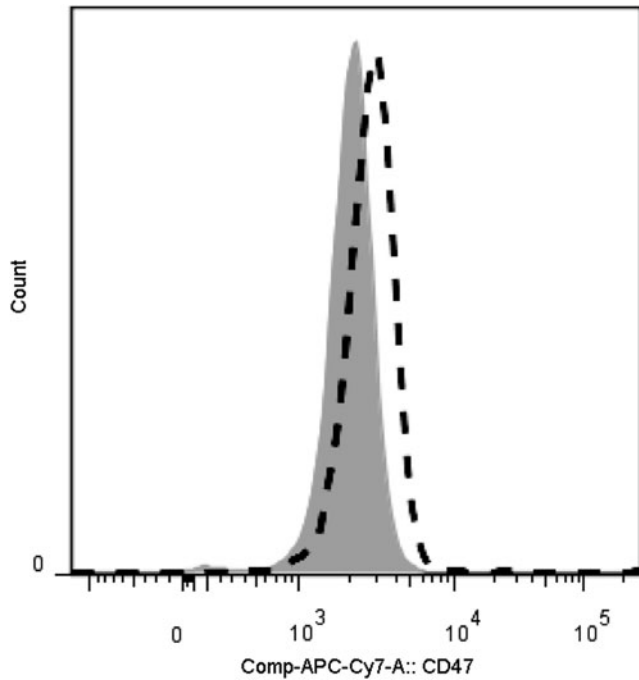

**SUPPLEMENTARY FIG. S3.** Up-regulation of CD47 on CD34<sup>+</sup> cells after overnight culture. Expression of CD47 on human CD34<sup>+</sup> UCB cells before (filled gray) and after (dashed black) overnight culture in StemSpan supplemented with stem cell factor, thrombopoietin, insulin-like growth factor 2, and fibroblast growth factor-1. Representative figure of three independent experiments.
